# Supplementary material for: Activation of astrocytes in hippocampus decreases fear memory through adenosine A1 receptors
Source: eLife. 2020 Sep 1;9:e57155. doi: 10.7554/eLife.57155 (PMC7505657; doi:10.7554/eLife.57155)
Supplement: Figure 1—source data 1. — Quantification of the percentages of co-localization cells in astrocytes positive for EYFP and GFAP; values for current and voltage of an astrocyte in voltage-clamp mode. [file elife-57155-fig1-data1.xlsx]

## Sheet: Figure 1B
Figure 1B
		EYFP+GFAP+ (number of cells)	EYFP+ (number of cells)	Specificity (%GFAP+ of EYFP+)
	1# rat	26	26	100
	2# rat	24	24	100
	3# rat	22	23	95.65
	4# rat	27	28	96.43
	5# rat	23	25	92
	6# rat	26	27	96.3

## Sheet: Figure 1C
Figure 1 C
		EYFP+GFAP+ (number of cells)	GFAP+ (number of cells)	%GFAP+ with EYFP+
	1# rat	26	26	100
	2# rat	24	26	92.31
	3# rat	22	26	84.62
	4# rat	27	29	93.1
	5# rat	23	25	92
	6# rat	26	28	92.86

## Sheet: Figure 1G
Figure 1 G
V (mV)	I (nA)
-140	-1.45203
-120	-0.99243
-100	-0.5542
-80	-0.11963
-60	0.322876
-40	0.779419
-20	1.25305
0	1.74255
20	2.24121
40	2.75208
60	3.26416
80	3.77502
100	4.2865
120	4.78882
140	5.26794
