# Supplementary material for: Activation of astrocytes in hippocampus decreases fear memory through adenosine A1 receptors
Source: eLife. 2020 Sep 1;9:e57155. doi: 10.7554/eLife.57155 (PMC7505657; doi:10.7554/eLife.57155)
Supplement: Figure 2—figure supplement 1—source data 1. — Values for freezing levels during fear-conditioning test. [file elife-57155-fig2-figsupp1-data1.xlsx]

## Sheet: Figure 2-figure supplement 1B
Figure 2-figure supplement 1B
	Ctrl (% Freezing )																Stim (% Freezing )
		1# rat	2# rat	3# rat	4# rat	5# rat	6# rat	7# rat	8# rat	9# rat			1# rat	2# rat	3# rat	4# rat	5# rat	6# rat	7# rat	8# rat	9# rat	10# rat
	0	18.1	35.2	30.4	23.6	20	21.2	31.1	5.1	6.4		0	29.5	10.1	50.6	15.3	23.9	13.8	46.8	0	5.5	13.8
	1	22.2	0	39.3	63.2	28.4	17.9	18.2	15.4	0		1	26.4	0	10.4	25.9	76.1	17.4	18	0	11.9	29.4
	2	85.4	100	25.6	38	60.8	99.5	95	54.4	91.5		2	59.5	76.9	48.5	73.9	100	89.1	50.2	17.8	75.5	84.1
	3	99.7	88.1	100	100	74.1	100	100	88.8	82.1		3	98.8	62.7	100	97.4	100	81	100	82	80.6	92.9

## Sheet: Figure 2-figure supplement 1C
Figure 2-figure supplement 1C
	Ctrl (% Freezing )				Stim (% Freezing )
	1# rat	67.6			1# rat	67.1
	2# rat	63			2# rat	31.3
	3# rat	77.9			3# rat	84.6
	4# rat	84.3			4# rat	67.2
	5# rat	96.5			5# rat	44.2
	6# rat	57.9			6# rat	62
	7# rat	97.3			7# rat	80.4
	8# rat	70.8			8# rat	29
	9# rat	88.3			9# rat	49.1
					10# rat	48.4

## Sheet: Figure 2-figure supplement 1D
Figure 2-figure supplement 1D
	Ctrl (% Freezing )			Stim (% Freezing )
	1# rat	95.37		1# rat	60.8
	2# rat	90.4		2# rat	82.7
	3# rat	85.93		3# rat	49.63
	4# rat	76.9		4# rat	60.5
	5# rat	55.07		5# rat	68.17
	6# rat	63.57		6# rat	52.63
	7# rat	73.07		7# rat	77.57
	8# rat	76.43		8# rat	84.57
	9# rat	76.2		9# rat	83.33
				10# rat	89.1
