# Supplementary material for: Activation of astrocytes in hippocampus decreases fear memory through adenosine A1 receptors
Source: eLife. 2020 Sep 1;9:e57155. doi: 10.7554/eLife.57155 (PMC7505657; doi:10.7554/eLife.57155)
Supplement: Figure 2—figure supplement 2—source data 1. — Values for freezing levels during fear-conditioning test. [file elife-57155-fig2-figsupp2-data1.xlsx]

## Sheet: Figure 2-figure supplement 2B
Figure 2-figure supplement 2B
	Ctrl (% Freezing )												Stim (% Freezing )
		1# rat	2# rat	3# rat	4# rat	5# rat	6# rat	7# rat	8# rat	9# rat				1# rat	2# rat	3# rat	4# rat	5# rat	6# rat	7# rat	8# rat	9# rat
	0	3.5	7.6	0	13.3	10	13.5	3.6	2.4	11.3			0	23.7	50	3.6	8.7	4	10	0	3.4	7.5
	1	0	20	0	0	7.8	31.1	0	0	0			1	35.1	32.1	0	0	24	10.6	0	7.6	0
	2	78.3	93.7	8	97.9	85.6	79.1	100	24.2	56.46			2	98.1	90.2	42.4	90.3	83.9	79.5	14.7	99.9	62.6
	3	71.4	81.1	98.7	100	100	100	97.4	86.9	100			3	91.4	100	89.4	99.9	83.9	94.7	54.4	100	94.6

## Sheet: Figure 2-figure supplement 2C
Figure 2-figure supplement 2C
	Ctrl (% Freezing )				Stim (% Freezing )
	1# rat	91.7			1# rat	57.4
	2# rat	81.9			2# rat	98.8
	3# rat	74.3			3# rat	32.1
	4# rat	73.3			4# rat	88.2
	5# rat	56.1			5# rat	85.6
	6# rat	98			6# rat	65
	7# rat	94			7# rat	72.3
	8# rat	90.3			8# rat	77
	9# rat	63.9			9# rat	80.3

## Sheet: Figure 2-figure supplement 2E
Figure 2-figure supplement 2E
	WT (% Freezing )														ChR2-EYFP (% Freezing )
		1# rat	2# rat	3# rat	4# rat	5# rat	6# rat	7# rat	8# rat	9# rat	10# rat				1# rat	2# rat	3# rat	4# rat	5# rat	6# rat	7# rat	8# rat	9# rat	10# rat	11# rat	12# rat	13# rat	14# rat
	0	7.2	12.8	17.2	14.4	0	4.3	3	7.3	8.1	5.2			0	2.4	6.7	5.9	0	0	2.7	10.1	0	7.6	7.1	34.2	0	6	6.1
	1	7.5	10.6	57.9	0	0	0	11.1	0	15.1	4.9			1	0	0	0	0	13.1	0	31.1	13.4	20	7.4	0	0	0	0
	2	69	100	100	74.4	15.4	12.4	27.1	93.1	100	93.4			2	19.9	31.8	47.8	100	0	88.1	100	91.5	93.7	19.6	99.3	99.9	34.1	79.2
	3	95.9	100	93.5	99.8	75.6	97.1	80.2	100	100	61.8			3	85.2	88.1	79.7	95.3	78.9	100	100	99.9	81.1	80.8	100	100	80.5	77.6

## Sheet: Figure 2-figure supplement 2F
Figure 2-figure supplement 2F
		ChR2-EYFP (% Freezing )				WT (% Freezing )
		1# rat	72.4			1# rat	69.8
		2# rat	83.4			2# rat	41.3
		3# rat	53.9			3# rat	90
		4# rat	63			4# rat	81.3
		5# rat	35.2			5# rat	79.7
		6# rat	75.7			6# rat	75
		7# rat	77.3			7# rat	65.6
		8# rat	67.3			8# rat	81.6
		9# rat	77.2			9# rat	69.6
		10# rat	89			10# rat	60.5
		11# rat	81.3
		12# rat	68.3
		13# rat	89.5
		14# rat	79.7
