# Supplementary material for: Activation of astrocytes in hippocampus decreases fear memory through adenosine A1 receptors
Source: eLife. 2020 Sep 1;9:e57155. doi: 10.7554/eLife.57155 (PMC7505657; doi:10.7554/eLife.57155)
Supplement: Figure 2—figure supplement 3—source data 1. — Values for freezing levels during fear-conditioning test. [file elife-57155-fig2-figsupp3-data1.xlsx]

## Sheet: Figure 2-figure supplement 3B
Figure 2-figure supplement 3B
	Ctrl (% Freezing )
		1# rat	2# rat	3# rat	4# rat	5# rat	6# rat	7# rat	8# rat	9# rat	10# rat	11# rat	12# rat	13# rat	14# rat
	0	2.4	6.7	5.9	0	0	2.7	10.1	0	7.6	7.1	34.2	0	6	6.1
	1	0	0	0	0	13.1	0	31.1	13.4	20	7.4	0	0	0	0
	2	19.9	31.8	47.8	100	0	88.1	100	91.5	93.7	19.6	99.3	99.9	34.1	79.2
	3	85.2	88.1	79.7	95.3	78.9	100	100	99.9	81.1	80.8	100	100	80.5	77.6
	1 Stim (% Freezing )
		1# rat	2# rat	3# rat	4# rat	5# rat	6# rat	7# rat	8# rat	9# rat	10# rat
	0	15.6	8.7	0	19	0	0	0	0	4.2	0
	1	18.6	0	15.1	0	0	0	0	0	18.9	0
	2	83	90.3	60.1	22.6	54.6	94.3	54.6	23.4	97.4	82.9
	3	88.4	99.9	55.8	63.4	81.9	96.5	81.9	97.8	88.4	99.6
	4 Stim (% Freezing )
		1# rat	2# rat	3# rat	4# rat	5# rat	6# rat	7# rat	8# rat	9# rat	10# rat	11# rat	12# rat
	0	9.5	16	2.9	5.6	8.9	2.1	3.2	14.9	1.8	0	7.7	56.3
	1	23.9	0	41	29.4	8.1	0	28.7	0	0	0	25.8	0
	2	92.8	0	92.4	100	100	12.9	100	13.6	88.9	17.8	94.6	92.8
	3	100	100	98.1	100	90.1	65.3	100	98.8	78.6	88.2	100	99.9

## Sheet: Figure 2-figure supplement 3C
Figure 2-figure supplement 3C
	Ctrl (% Freezing )				1 Stim (% Freezing )				4 Stim (% Freezing )
	1# rat	72.4			1# rat	37.6			1# rat	61.4
	2# rat	83.4			2# rat	33.6			2# rat	74
	3# rat	53.9			3# rat	58.7			3# rat	42.7
	4# rat	63			4# rat	36.2			4# rat	56.2
	5# rat	35.2			5# rat	82.8			5# rat	15.8
	6# rat	75.7			6# rat	34.1			6# rat	33.2
	7# rat	77.3			7# rat	44.6			7# rat	67.4
	8# rat	67.3			8# rat	40.5			8# rat	37.7
	9# rat	77.2			9# rat	17.7			9# rat	15.8
	10# rat	89			10# rat	60.2			10# rat	48.6
	11# rat	81.3							11# rat	79.4
	12# rat	68.3							12# rat	38.7
	13# rat	89.5
	14# rat	79.7
