# Supplementary material for: Activation of astrocytes in hippocampus decreases fear memory through adenosine A1 receptors
Source: eLife. 2020 Sep 1;9:e57155. doi: 10.7554/eLife.57155 (PMC7505657; doi:10.7554/eLife.57155)
Supplement: Figure 2—figure supplement 4—source data 1. — Values for moving distance and center zone exploration time in the open-field test; values for freezing levels during fear-conditioning test. [file elife-57155-fig2-figsupp4-data1.xlsx]

## Sheet: Figure 2-figure supplement 4C
Figure 2-figure supplement 4C
	Control: distance (m)				hPMCA2w/b: distance (m)
	1# rat	21.369			1# rat	19.022
	2# rat	13.448			2# rat	22.32
	3# rat	26.477			3# rat	26.43
	4# rat	26.999			4# rat	22.087
	5# rat	18.377			5# rat	18.405
	6# rat	26.517			6# rat	20.895
	7# rat	20.118			7# rat	24.172
	8# rat	19.352			8# rat	7.227
	9# rat	19.564			9# rat	16.493
	10# rat	19.739			10# rat	19.517

## Sheet: Figure 2-figure supplement 4D
Figure 2-figure supplement 4D
	Ctrl: center zone time (s)				hPMCA2w/b: center zone time (s)
	1# rat	12			1# rat	23
	2# rat	7.7			2# rat	21.6
	3# rat	25.1			3# rat	17.8
	4# rat	9			4# rat	19.6
	5# rat	8.2			5# rat	11.9
	6# rat	13.2			6# rat	4.9
	7# rat	3.4			7# rat	10.7
	8# rat	15.2			8# rat	4.4
	9# rat	7.8			9# rat	4.9
	10# rat	10.4			10# rat	10.7

## Sheet: Figure 2-figure supplement 4E
Figure 2-figure supplement 4E
	Ctrl (% Freezing )													hPMCA2w/b (% Freezing )
		1# rat	2# rat	3# rat	4# rat	5# rat	6# rat	7# rat	8# rat	9# rat	10# rat				1# rat	2# rat	3# rat	4# rat	5# rat	6# rat	7# rat	8# rat	9# rat	10# rat
	0	2.5	5.5	17.4	1.8	7.2	7.2	6	8.1	14.2	21.6			0	1.8	2.2	4.9	6.1	18.1	7.8	5	8.1	30.6	12.1
	1	0	14.9	27.2	0	25.4	0	0	26.6	33.6	20			1	0	0	0	0	57.4	11.5	12.9	12.4	63.1	0
	2	14.6	64.9	81.8	99.9	99.1	22.4	19.1	99.9	100	89.9			2	100	15.9	48.4	82.8	100	100	67.6	100	96.6	38.9
	3	93.7	92.9	100	100	100	100	89.3	99.9	100	91.4			3	100	99.1	100	97.5	100	100	100	100	81.4	100
