# Supplementary material for: Activation of astrocytes in hippocampus decreases fear memory through adenosine A1 receptors
Source: eLife. 2020 Sep 1;9:e57155. doi: 10.7554/eLife.57155 (PMC7505657; doi:10.7554/eLife.57155)
Supplement: Figure 2—source data 1. — Values for freezing levels during fear-conditioning test; values for moving distance and center zone exploration time in the open-field test. [file elife-57155-fig2-data1.xlsx]

## Sheet: Figure 2D
Figure 2D
		Ctrl (% Freezing )																		Stim (% Freezing )
		1# rat	2# rat	3# rat	4# rat	5# rat	6# rat	7# rat	8# rat	9# rat	10# rat	11# rat	12# rat	13# rat	14# rat					1# rat	2# rat	3# rat	4# rat	5# rat	6# rat	7# rat	8# rat	9# rat	10# rat
	0	2.4	6.7	5.9	0	0	2.7	10.1	0	7.6	7.1	34.2	0	6	6.1		0			15.6	8.7	0	19	0	0	0	0	4.2	0
	1	0	0	0	0	13.1	0	31.1	13.4	20	7.4	0	0	0	0		1			18.6	0	15.1	0	0	0	0	0	18.9	0
	2	19.9	31.8	47.8	100	0	88.1	100	91.5	93.7	19.6	99.3	99.9	34.1	79.2		2			83	90.3	60.1	22.6	54.6	94.3	54.6	23.4	97.4	82.9
	3	85.2	88.1	79.7	95.3	78.9	100	100	99.9	81.1	80.8	100	100	80.5	77.6		3			88.4	99.9	55.8	63.4	81.9	96.5	81.9	97.8	88.4	99.6

## Sheet: Figure 2E
Figure 2E
	Ctrl (% Freezing )				Stim (% Freezing )
	1# rat	72.4			1# rat	37.6
	2# rat	83.4			2# rat	33.6
	3# rat	53.9			3# rat	58.7
	4# rat	63			4# rat	36.2
	5# rat	35.2			5# rat	82.8
	6# rat	75.7			6# rat	34.1
	7# rat	77.3			7# rat	44.6
	8# rat	67.3			8# rat	40.5
	9# rat	77.2			9# rat	17.7
	10# rat	89			10# rat	60.2
	11# rat	81.3
	12# rat	68.3
	13# rat	89.5
	14# rat	79.7

## Sheet: Figure 2F
Figure 2F
	Ctrl (% Freezing )				Stim (% Freezing )
	1# rat	79.4			1# rat	52.63
	2# rat	34.37			2# rat	49.3
	3# rat	96			3# rat	61.03
	4# rat	95.23			4# rat	74.9
	5# rat	77.67			5# rat	99.87
	6# rat	80			6# rat	70.8
	7# rat	37.97			7# rat	45.33
	8# rat	64.43			8# rat	88.33
	9# rat	63.87			9# rat	93.27
	10# rat	97.87			10# rat	98.43
	11# rat	88.27
	12# rat	75
	13# rat	87.47
	14# rat	99.57

## Sheet: Figure 2J
Figure 2J
	Ctrl (% Freezing )				hPMCA2w/b (% Freezing )
	1# rat	73			1# rat	90.3
	2# rat	67.1			2# rat	75.4
	3# rat	87.9			3# rat	91
	4# rat	80.4			4# rat	87.4
	5# rat	46.9			5# rat	74.8
	6# rat	88			6# rat	99
	7# rat	48.8			7# rat	96.6
	8# rat	61			8# rat	97.3
	9# rat	71			9# rat	95.2
	10# rat	90.4			10# rat	92.2

## Sheet: Figure 2K
Figure 2K
	Ctrl (% Freezing )				hPMCA2w/b (% Freezing )
	1# rat	91.57			1# rat	79.53
	2# rat	82.33			2# rat	79.77
	3# rat	88.6			3# rat	45.73
	4# rat	86.9			4# rat	72.33
	5# rat	77.8			5# rat	77.3
	6# rat	55.67			6# rat	94.83
	7# rat	77.6			7# rat	96.7
	8# rat	76.13			8# rat	79.87
	9# rat	64.3			9# rat	83.07
	10# rat	91.47			10# rat	57.33

## Sheet: Figure 2M
Figure 2M
	Ctrl—Distanced moved (m)				Fear—Distanced moved (m)				Fear+AstrStim—Distanced moved (m)
	1# rat	19.595			1# rat	1.759			1# rat	32.827
	2# rat	21.443			2# rat	8.569			2# rat	13.635
	3# rat	23.705			3# rat	1.579			3# rat	14.601
	4# rat	18.157			4# rat	4.852			4# rat	18.759
	5# rat	22.967			5# rat	16.691			5# rat	33.87
	6# rat	25.234			6# rat	9.912			6# rat	20.855
	7# rat	14.451			7# rat	12.642			7# rat	28.62
	8# rat	16.483			8# rat	16.771			8# rat	35.022
	9# rat	19.789			9# rat	2.843			9# rat	11.675
	10# rat	12.393			10# rat	16.532			10# rat	8.289
	11# rat	16.385			11# rat	10.35
	12# rat	7.563			12# rat	12.8
	13# rat	31.059			13# rat	11.928
	14# rat	22.553
	15# rat	14.241
	16# rat	21.161
	17# rat	12.236
	18# rat	31.592

## Sheet: Figure 2N
Figure 2N
	Ctrl—Center zone time (s)				Fear—Center zone time (s)				Fear+AstrStim—Center zone time (s)
	1# rat	2.4			1# rat	0.1			1# rat	30.5
	2# rat	17.3			2# rat	3			2# rat	2.7
	3# rat	6.6			3# rat	0			3# rat	1.4
	4# rat	6.8			4# rat	0.5			4# rat	7.4
	5# rat	13.7			5# rat	5.5			5# rat	2
	6# rat	4.9			6# rat	0			6# rat	13.4
	7# rat	10.3			7# rat	4.4			7# rat	15.6
	8# rat	5			8# rat	3.7			8# rat	13.8
	9# rat	17.9			9# rat	0			9# rat	19.9
	10# rat	1.9			10# rat	4.4			10# rat	7.2
	11# rat	4.6			11# rat	2.1
	12# rat	3.9			12# rat	1.6
	13# rat	12.2			13# rat	2.8
	14# rat	7.6
	15# rat	7
	16# rat	7.7
	17# rat	4.8
	18# rat	24.9

## Sheet: Figure 2P
Figure 2P
		WT—Distanced moved (m)													ChR2-EYFP—Distanced moved (m)
		1# rat	2# rat	3# rat	4# rat	5# rat	6# rat	7# rat	8# rat	9# rat	10# rat				1# rat	2# rat	3# rat	4# rat	5# rat	6# rat	7# rat	8# rat	9# rat	10# rat	11# rat	12# rat	13# rat	14# rat	15# rat	16# rat	17# rat	18# rat
	OFF	17.971	15.434	14.321	15.608	17.798	16.225	16.253	7.212	8.082	9.062			OFF	4.882	10.886	12.678	10.861	14.12	13.756	15.186	9.9	5.904	9.659	14.992	11.503	10.739	5.665	9.485	11.57	17.7	14.673
	ON	20.633	17.581	11.224	11.816	11.635	9.082	10.5	3.769	1.17	9.374			ON	29.592	11.487	10.782	3.151	10.546	16.969	8.819	13.366	0.178	0.594	8.285	9.292	9.778	0.511	7.895	4.673	9.536	12.23
	OFF	17.586	15.783	12.87	7.536	5.336	7.288	8.679	0	5.07	4.124			OFF	17.276	9.474	7.437	35.545	8.142	15.762	11.498	13.198	3.138	2.314	6.127	8.924	5.564	0.952	5.069	7.811	5.568	10.034

## Sheet: Figure 2Q
Figure 2Q
		WT—Center zone time (s)													ChR2-EYFP—Center zone time (s)
		1# rat	2# rat	3# rat	4# rat	5# rat	6# rat	7# rat	8# rat	9# rat	10# rat				1# rat	2# rat	3# rat	4# rat	5# rat	6# rat	7# rat	8# rat	9# rat	10# rat	11# rat	12# rat	13# rat	14# rat	15# rat	16# rat	17# rat	18# rat
	OFF	17.6	8.4	2.6	9.5	4.8	7.6	4	7.8	2	11.5			OFF	16	3.1	0.6	2.3	26	12.3	13.7	6.1	8.5	4.3	6.5	5.6	9.4	2.5	0	1.7	3	1.6
	ON	17.2	10.8	0.5	3.8	4.6	5.9	11.6	0	1.4	5.5			ON	21.7	14.8	6.7	0	4.7	6.9	11.2	20.8	0	0	5.7	1.6	13.6	0	4.7	3.5	8.3	0
	OFF	16.7	3.2	13	1	1	11.6	7.3	0	8	4.3			OFF	0	22.6	0	0	14.3	0	38.2	18.5	0	0	2.6	5.6	11.4	0	0	13.6	4.1	0.1
