# Supplementary material for: Activation of astrocytes in hippocampus decreases fear memory through adenosine A1 receptors
Source: eLife. 2020 Sep 1;9:e57155. doi: 10.7554/eLife.57155 (PMC7505657; doi:10.7554/eLife.57155)
Supplement: Figure 3—source data 1. — Values for freezing levels during fear conditioning test; values for time spent exploring the object during the OLR task. [file elife-57155-fig3-data1.xlsx]

## Sheet: Figure 3B
Figure 3B
	Ctrl (% Freezing )																	Interval=1 h (% Freezing )												Interval=2 h (% Freezing )								Interval=3 h (% Freezing )
		1# rat	2# rat	3# rat	4# rat	5# rat	6# rat	7# rat	8# rat	9# rat	10# rat	11# rat	12# rat	13# rat	14# rat				1# rat	2# rat	3# rat	2# rat	3# rat	4# rat	5# rat	6# rat	7# rat				1# rat	2# rat	3# rat	4# rat	5# rat				1# rat	2# rat	3# rat	4# rat	5# rat
	0	2.4	6.7	5.9	0	0	2.7	10.1	0	7.6	7.1	34.2	0	6	6.1			0	2	5.8	21.1	5.8	21.1	0	3.3	6.1	2.3			0	1.8	0	0	8.6	36			0	13.8	0	4.15	0	19.2
	1	0	0	0	0	13.1	0	31.1	13.4	20	7.4	0	0	0	0			1	9.4	0	0	0	0	7.3	31.9	20.6	18.5			1	38.8	0	0	22.6	9.1			1	0	0	0	0	66.1
	2	19.9	31.8	47.8	100	0	88.1	100	91.5	93.7	19.6	99.3	99.9	34.1	79.2			2	99.9	44.9	55.79	44.9	55.79	58.6	87.4	38.6	99.8			2	62.4	75.71	47.5	79.7	81.8			2	100	82.86	22.36	77.9	50.6
	3	85.2	88.1	79.7	95.3	78.9	100	100	99.9	81.1	80.8	100	100	80.5	77.6			3	96	100	73.29	100	73.29	85.4	97.6	78.5	100			3	99.5	71.86	78.5	100	99.6			3	100	98.07	52.29	94.8	72.7

## Sheet: Figure 3C
Figure 3C
	Ctrl (% Freezing )				Interval=1 h (% Freezing )				Interval=2 h (% Freezing )				Interval=3 h (% Freezing )
	1# rat	72.4			1# rat	58.9			1# rat	51.1			1# rat	62.8
	2# rat	83.4			2# rat	39.1			2# rat	75.2			2# rat	88
	3# rat	53.9			3# rat	25.9			3# rat	74			3# rat	69.7
	4# rat	63			4# rat	46.8			4# rat	90			4# rat	80.4
	5# rat	35.2			5# rat	59.9			5# rat	63.9			5# rat	54.4
	6# rat	75.7			6# rat	58.5
	7# rat	77.3			7# rat	38.2
	8# rat	67.3
	9# rat	77.2
	10# rat	89
	11# rat	81.3
	12# rat	68.3
	13# rat	89.5
	14# rat	79.7

## Sheet: Figure 3E
Figure 3E
	Ctrl (% Freezing )																							Stim (% Freezing )
	Day																						Day
	2	72.4	83.4	53.9	63	35.2	75.7	77.3	67.3	77.2	89	81.3	68.3	89.5	79.7	61.9	95.9	88.9	81.8				2	37.6	33.6	58.7	36.2	82.8	34.1	44.6	40.5	17.7	60.2	50.6	51.9	29.8	37.1	60.2	77.3	26.3	54.6
	3	70.4	94.2	87.9	94.7	31.8	97.2	69.8	26.3	90	81.3	79.7	65.6	71.6	92.2	49.8	87.4						3	60.1	34.8	12	11.8	33.2	82.9	63.4	31.9	53.3	53.9	46.8	44.9	67.7	45.8	66.6	22	59.3	50.1	78.3	18.8	65.6	62
	8	42	88.2	84.9	80.8	38.6	64.2	49.2	87.1	79.8	66.1	80.2	74	91.4	75.7	81.6							8	26.1	57.3	40.6	71.7	65.2	17.3	28.4	42.9	61.6	68.4	32.9	34.1	58.5	36.8	32.4	70.7	72.5
	16	61.8	58.6	85	38.2	56.5	68.6	59.8	62.6	78.6	91.7	56.2											16	61.4	56.7	48.7	39.6	51.9	33	46	33.7	61.5	36.4	58	26.8	70	37.7	69.6	40.2
	26	52.4	43.5	52.8	30.6	44	47.5	44.6	56.2	66.9	25.7	51.1	49.5	62.5									26	12.8	23.7	2.1	25.5	50.9	47.8	42	39.1	18.6	29	17.7	28.1	15.2	28.8	35.1	34.7	42.4	53	53.6

## Sheet: Figure 3F
Figure 3F
	Ctrl (% Freezing )																	Stim (% Freezing )
		1# rat	2# rat	3# rat	4# rat	5# rat	6# rat	7# rat	8# rat	9# rat	10# rat	11# rat	12# rat	13# rat	14# rat				1# rat	2# rat	3# rat	4# rat	5# rat	6# rat	7# rat	8# rat
	0	2.4	6.7	5.9	0	0	2.7	10.1	0	7.6	7.1	34.2	0	6	6.1			0	0	19	0	10	6.1	6	5	8.7
	1	0	0	0	0	13.1	0	31.1	13.4	20	7.4	0	0	0	0			1	0	22.6	13.6	27.6	16	0	18.6	0
	2	19.9	31.8	47.8	100	0	88.1	100	91.5	93.7	19.6	99.3	99.9	34.1	79.2			2	77.9	48.3	54.6	36.6	79.2	58.5	83	75.3
	3	85.2	88.1	79.7	95.3	78.9	100	100	99.9	81.1	80.8	100	100	80.5	77.6			3	94.5	64.6	82.2	100	77.6	80.5	87.3	98.2

## Sheet: Figure 3G
Figure 3G
	Day 2 (% Freezing )				Day 28 (% Freezing )
	1# rat	72.4			1# rat	56.8
	2# rat	83.4			2# rat	62.1
	3# rat	53.9			3# rat	36.8
	4# rat	63			4# rat	85.5
	5# rat	35.2			5# rat	81.1
	6# rat	75.7			6# rat	89
	7# rat	77.3			7# rat	57.4
	8# rat	67.3			8# rat	79.7
	9# rat	77.2
	10# rat	89
	11# rat	81.3
	12# rat	68.3
	13# rat	89.5
	14# rat	79.7

## Sheet: Figure 3H
Figure 3H
	Ctrl					Conditioned
	DO	UDO				DO	UDO
1# rat	32.73	67.27			1# rat	50.77	49.23
2# rat	38.15	61.85			2# rat	50.58	49.42
3# rat	67.06	32.94			3# rat	61.19	38.81
4# rat	43.58	56.42			4# rat	55.44	44.56
5# rat	47.59	52.41			5# rat	35.71	64.29
6# rat	52.08	47.92			6# rat	66.39	33.61
7# rat	55.46	44.54			7# rat	67.79	32.21
8# rat	69.14	30.86			8# rat	24.12	75.88
9# rat	47.42	52.58
10# rat	31.51	68.49

## Sheet: Figure 3I
Figure 3I
	Ctrl					Conditioned
	Familiar	Novel				Familiar	Novel
1# rat	37.86	62.14			1# rat	47	53
2# rat	1.93	98.07			2# rat	2.31	97.69
3# rat	31.1	68.9			3# rat	32.94	67.06
4# rat	51.77	48.23			4# rat	50.95	49.05
5# rat	57.34	42.66			5# rat	30.22	69.78
6# rat	26.76	73.24			6# rat	37.05	62.95
7# rat	43.65	56.35			7# rat	48.21	51.79
8# rat	36.02	63.98			8# rat	44.05	55.95
9# rat	27.73	72.27
10# rat	51.44	48.56

## Sheet: Figure 3J
Figure 3J
		Ctrl				Conditioned
	1# rat	0.24			1# rat	0.06
	2# rat	0.96			2# rat	0.95
	3# rat	0.38			3# rat	0.34
	4# rat	-0.04			4# rat	-0.02
	5# rat	-0.15			5# rat	0.4
	6# rat	0.46			6# rat	0.26
	7# rat	0.13			7# rat	0.04
	8# rat	0.28			8# rat	0.12
	9# rat	0.45
	10# rat	-0.03
