# Supplementary material for: Activation of astrocytes in hippocampus decreases fear memory through adenosine A1 receptors
Source: eLife. 2020 Sep 1;9:e57155. doi: 10.7554/eLife.57155 (PMC7505657; doi:10.7554/eLife.57155)
Supplement: Figure 4—figure supplement 1—source data 1. — Values for moving distance and center zone exploration time in the open-field test. [file elife-57155-fig4-figsupp1-data1.xlsx]

## Sheet: Figure 4-figure supplement 1B
Figure 4-figure supplement 1B
		Vehicle—Distanced moved (m)				NECA—Distanced moved (m)
		1# rat	17.468			1# rat	39.413
		2# rat	21.117			2# rat	13.471
		3# rat	15.283			3# rat	17.187
		4# rat	21.385			4# rat	24.69
		5# rat	15.65			5# rat	24.151
		6# rat	24.577			6# rat	19.237
		7# rat	23.892			7# rat	28.457
						8# rat	16.464
						9# rat	12.715

## Sheet: Figure 4-figure supplement 1C
Figure 4-figure supplement 1C
	Vehicle—Center zone time (s)				NECA—Center zone time (s)
	1# rat	5.3			1# rat	18
	2# rat	9			2# rat	0
	3# rat	3.8			3# rat	11.2
	4# rat	2.8			4# rat	7.9
	5# rat	3			5# rat	9
	6# rat	12.9			6# rat	9.1
	7# rat	22.2			7# rat	18.7
					8# rat	1.4
					9# rat	4.1

## Sheet: Figure 4-figure supplement 1D
Figure 4-figure supplement 1D
	Vehicle—Distanced moved (m)				CCPA—Distanced moved (m)
	1# rat	17.468			1# rat	18.812
	2# rat	21.117			2# rat	32.113
	3# rat	27.443			3# rat	26.709
	4# rat	17.157			4# rat	17.519
	5# rat	15.65			5# rat	10.617
	6# rat	24.577			6# rat	18.118
	7# rat	23.892			7# rat	21.628
	8# rat	17.982

## Sheet: Figure 4-figure supplement 1E
Figure 4-figure supplement 1E
	Vehicle—Center zone time (s)				CCPA—Center zone time (s)
	1# rat	5.3			1# rat	11.4
	2# rat	9			2# rat	9.8
	3# rat	0			3# rat	22.6
	4# rat	11.8			4# rat	3.2
	5# rat	3			5# rat	4.4
	6# rat	12.9			6# rat	1.7
	7# rat	22.2			7# rat	6.5
	8# rat	3.6
