# Supplementary material for: Activation of astrocytes in hippocampus decreases fear memory through adenosine A1 receptors
Source: eLife. 2020 Sep 1;9:e57155. doi: 10.7554/eLife.57155 (PMC7505657; doi:10.7554/eLife.57155)
Supplement: Figure 4—source data 1. — Values for extracellular ATP and adenosine concentrations prior to and following photostimulation; values for freezing levels during fear-conditioning test. [file elife-57155-fig4-data1.xlsx]

## Sheet: Figure 4B
Figure 4B
		ATP concentration (nM)					adenosine concentration (μM)
		1st	2nd				1st	2nd
	1# rat	0.04	1.1			1# rat	3.21284	3.54819
	2# rat	0.31	1.89			2# rat	2.74083	3.0392
	3# rat	1.31	2.51			3# rat	2.38348	3.53461
	4# rat	0.73	1.19			4# rat	3.28952	3.65003
	5# rat	1.32	3.07			5# rat	2.77863	3.30154

## Sheet: Figure 4E
Figure 4E
	Vehicle (% Freezing )														2 mM ATPrS (% Freezing )
		1# rat	2# rat	3# rat	4# rat	5# rat	6# rat	7# rat	8# rat	9# rat	10# rat	11# rat				1# rat	2# rat	3# rat	4# rat	5# rat	6# rat	7# rat
	0	0	39.3	11.3	1.8	27.6	15.5	6.3	13.3	6.2	0	11.5			0	2.1	1.9	15.9	3.5	0	36.1	10.9
	1	0	0	49.9	0	0	27	0	11.1	50.2	0	0			1	7.4	28.6	0	0	0	22.7	8.9
	2	19	74.1	64.9	99.3	98.8	29.7	23.4	99.9	100	45.2	88.3			2	89.4	25.6	57.5	99.6	21.7	74.6	82.7
	3	93.1	100	96.7	100	91.9	79.6	97.6	100	100	99.5	99.7			3	100	100	83.1	99.2	40.5	100	100
	9 mM ATPrS (% Freezing )														5 mM MeSADP (% Freezing )
		1# rat	2# rat	3# rat	4# rat	5# rat	6# rat									1# rat	2# rat	3# rat	4# rat	5# rat	6# rat	7# rat
	0	11.6	9.9	19	5	5	10								0	4.1	4.6	5.2	0	6	43.5	14.5
	1	37.8	0	0	0	9.6	15.6								1	0	0	36.9	0	0	9.4	57.6
	2	97.5	46.5	82	99.1	20.7	29.7								2	99.1	56.8	100	37.9	24.6	49	88.3
	3	100	69.9	98.3	99.9	86.9	91.3								3	100	100	100	94.4	16.6	100	100

## Sheet: Figure 4F
Figure 4F
	Vehicle (% Freezing )											NECA (% Freezing )										CCPA (% Freezing )
		1# rat	2# rat	3# rat	4# rat	5# rat	6# rat	7# rat	8# rat				1# rat	2# rat	3# rat	4# rat	5# rat	6# rat	7# rat				1# rat	2# rat	3# rat	4# rat	5# rat	6# rat
	0	1.9	0	0	31.1	0	7.5	16.1	20.1			0	26.4	0	16.8	14.4	3.4	28.2	1.9			0	29.1	2.2	5.5	7.6	3.6	4.3
	1	8	0	0	9	0	30.4	15	0			1	67.7	0	0	13.9	2.7	0	0			1	0.4	0	18.6	0	20.1	23.9
	2	99.6	92.7	19.4	79.1	64.3	47.1	95.4	97.5			2	90.5	100	100	87	94.7	7.6	68.4			2	100	81.9	100	41.4	11.9	100
	3	100	99.8	83.6	99.9	98.3	55.9	100	100			3	100	99.9	100	93.9	100	97.5	66.9			3	100	89.2	99.6	94.5	96.6	100

## Sheet: Figure 4G
Figure 4G
	Vehicle (% Freezing )										CGS 21680 (% Freezing )
		1# rat	2# rat	3# rat	4# rat	5# rat	6# rat	7# rat				1# rat	2# rat	3# rat	4# rat	5# rat	6# rat
	0	24.2	0	0	11	3.3	0	0			0	12.11	9.37	8.84	21.3	4.32	3.56
	1	22.9	0	0	0	10.1	0	0			1	15.83	10.27	7.33	16.53	6.97	8.32
	2	84.5	89.9	32.6	69.6	78.1	17.7	20.4			2	50.74	56.38	65.32	97.42	84.36	85.32
	3	100	93.6	86.4	99.6	100	99.4	99.4			3	88.69	90.78	77.99	100	99.5	100.3

## Sheet: Figure 4H
Figure 4H
	Vehicle (% Freezing )				2 mM ATPrS (% Freezing )				9 mM ATPrS (% Freezing )				5 mM MeSADP (% Freezing )
	1# rat	64			1# rat	85.6			1# rat	90.6			1# rat	64.5
	2# rat	87.2			2# rat	59.8			2# rat	92.1			2# rat	79.5
	3# rat	41.3			3# rat	67.4			3# rat	68.4			3# rat	68.7
	4# rat	76.4			4# rat	75.2			4# rat	82.5			4# rat	81.6
	5# rat	86			5# rat	69.3			5# rat	61.3			5# rat	70.3
	6# rat	90.6			6# rat	90.6			6# rat	55.7			6# rat	89.4
	7# rat	50.9			7# rat	66.1								52.8
	8# rat	80
	9# rat	93.4
	10# rat	94.1
	11# rat	67

## Sheet: Figure 4I
Figure 4I
	Vehicle (% Freezing )				NECA (% Freezing )				CCPA (% Freezing )
	1# rat	90			1# rat	32			1# rat	44.5
	2# rat	78.6			2# rat	61.1			2# rat	3.1
	3# rat	69			3# rat	29.6			3# rat	2.8
	4# rat	70			4# rat	44.6			4# rat	35
	5# rat	48.8			5# rat	49.8			5# rat	67.5
	6# rat	89.6			6# rat	26.5			6# rat	27.3
	7# rat	89.9			7# rat	33.1
	8# rat	86

## Sheet: Figure 4J
Figure 4J
		Vehicle (% Freezing )				CGS 21680 (% Freezing )
		1# rat	91.7			1# rat	87.8
		2# rat	55.4			2# rat	70.4
		3# rat	66.9			3# rat	70.9
		4# rat	86.3			4# rat	83.8
		5# rat	83.7			5# rat	70.3
		6# rat	74.4			6# rat	39
		7# rat	80.9			7# rat	65.1
