# Supplementary material for: Activation of astrocytes in hippocampus decreases fear memory through adenosine A1 receptors
Source: eLife. 2020 Sep 1;9:e57155. doi: 10.7554/eLife.57155 (PMC7505657; doi:10.7554/eLife.57155)
Supplement: Figure 5—figure supplement 1—source data 1. — Values for moving distance and center zone exploration time in the open-field test. [file elife-57155-fig5-figsupp1-data1.xlsx]

## Sheet: Figure 5-figure supplement 1B
Figure 5-figure supplement 1B
		Vehicle—Distanced moved (m)					CPT—Distanced moved (m)
	1# rat	18.688				1# rat	37.845
	2# rat	25.732				2# rat	17.668
	3# rat	35.065				3# rat	10.994
	4# rat	18.812				4# rat	14.35
	5# rat	27.874				5# rat	24.427
	6# rat	28.882				6# rat	29.02
	7# rat	15.481				7# rat	13.99
						8# rat	20.84

## Sheet: Figure 5-figure supplement 1C
Figure 5-figure supplement 1C
		Vehicle—Center zone time (s)				CPT—Center zone time (s)
	1# rat	0			1# rat	19.1
	2# rat	12.1			2# rat	11.3
	3# rat	17.8			3# rat	1.1
	4# rat	11.4			4# rat	3
	5# rat	4.9			5# rat	21.4
	6# rat	15.6			6# rat	17.3
	7# rat	2.6			7# rat	12
					8# rat	2.9
