# Supplementary material for: Activation of astrocytes in hippocampus decreases fear memory through adenosine A1 receptors
Source: eLife. 2020 Sep 1;9:e57155. doi: 10.7554/eLife.57155 (PMC7505657; doi:10.7554/eLife.57155)
Supplement: Figure 5—source data 1. — Values for freezing levels during fear-conditioning test. [file elife-57155-fig5-data1.xlsx]

## Sheet: Figure 5C
Figure 5C
	Control (% Freezing )																	Stim (% Freezing )
		1# rat	2# rat	3# rat	4# rat	5# rat	6# rat	7# rat	8# rat	9# rat	10# rat	11# rat	12# rat	13# rat	14# rat				1# rat	2# rat	3# rat	4# rat	5# rat	6# rat	7# rat	8# rat	9# rat	10# rat
	0	20.4	4.8	3.3	21.2	26.7	2.2	9.8	15.4	16.6	23.4	0	4.4	5.6	2.1			0	27.9	8.8	10.1	14.8	1.9	10.1	19.8	12.1	12.3	5.2
	1	0	9.5	3.1	0	13.6	11.4	11.2	28.7	58.5	24.6	18.9	16.1	0	0			1	21.1	39.8	0	12.4	0	0	26.7	14.1	0	8.9
	2	94.7	7.3	85.7	2	67.1	0	83.4	99.8	62.4	55.8	95.8	100	66.7	100			2	61.7	61.5	86.5	67.2	100	100	41.7	57.8	98.6	7.4
	3	99.4	35.9	100	99.1	84.6	93.4	96.1	100	95.4	64.9	99.8	100	99.6	100			3	84.3	83	100	75.9	100	100	42.7	85.1	100	45.5
	Stim+Vehicle (% Freezing )									Stim+ARL67156 (% Freezing )
		1# rat	2# rat	3# rat	4# rat	5# rat	6# rat				1# rat	2# rat	3# rat	4# rat	5# rat	6# rat	7# rat
	0	4.2	0	5.5	13.7	6.63	25.1			0	17.5	0	0	18.9	8.3	0.15	7.68
	1	18.9	0	23.5	0	26.5	7.7			1	22.6	0	0	26.1	24.9	9.21	0
	2	81.6	28.6	100	99.6	38.86	60.1			2	40.6	82.9	49.36	100	99.8	51.64	76.5
	3	85	74.7	100	100	62.21	99			3	57.1	98.1	99.71	100	100	97.21	46.36

## Sheet: Figure 5D
Figure 5D
	Control (% Freezing )																	Stim (% Freezing )
		1# rat	2# rat	3# rat	4# rat	5# rat	6# rat	7# rat	8# rat	9# rat	10# rat	11# rat	12# rat	13# rat	14# rat				1# rat	2# rat	3# rat	4# rat	5# rat	6# rat	7# rat	8# rat	9# rat	10# rat
	0	20.4	4.8	3.3	21.2	26.7	2.2	9.8	15.4	16.6	23.4	0	4.4	5.6	2.1			0	27.9	8.8	10.1	14.8	1.9	10.1	19.8	12.1	12.3	5.2
	1	0	9.5	3.1	0	13.6	11.4	11.2	28.7	58.5	24.6	18.9	16.1	0	0			1	21.1	39.8	0	12.4	0	0	26.7	14.1	0	8.9
	2	94.7	7.3	85.7	2	67.1	0	83.4	99.8	62.4	55.8	95.8	100	66.7	100			2	61.7	61.5	86.5	67.2	100	100	41.7	57.8	98.6	7.4
	3	99.4	35.9	100	99.1	84.6	93.4	96.1	100	95.4	64.9	99.8	100	99.6	100			3	84.3	83	100	75.9	100	100	42.7	85.1	100	45.5
	Stim+Vehicle (% Freezing )											Stim+CPT (% Freezing )
		1# rat	2# rat	3# rat	4# rat	5# rat	6# rat	7# rat	8# rat				1# rat	2# rat	3# rat	4# rat	5# rat	6# rat	7# rat	8# rat
	0	2.05	2	9.2	17.47	33.8	0.1	8.4	5.32			0	0	42.5	0	0	0	0	0	28.1
	1	0	9.4	0	22.57	34.7	9.2	20.3	0			1	23.6	48.3	0	0	0	0	0	30
	2	99.14	99.9	99.9	40.57	100	51.6	37.8	18.64			2	99.6	87.9	75	45.57	23.4	75.7	49.4	99.9
	3	100	96	100	57.07	97.1	97.2	99.7	92.86			3	91.4	73	83	99.86	66	71.9	99.7	99.9

## Sheet: Figure 5E
Figure 5E
	Control (% Freezing )																	Stim (% Freezing )
		1# rat	2# rat	3# rat	4# rat	5# rat	6# rat	7# rat	8# rat	9# rat	10# rat	11# rat	12# rat	13# rat	14# rat				1# rat	2# rat	3# rat	4# rat	5# rat	6# rat	7# rat	8# rat	9# rat	10# rat
	0	20.4	4.8	3.3	21.2	26.7	2.2	9.8	15.4	16.6	23.4	0	4.4	5.6	2.1			0	27.9	8.8	10.1	14.8	1.9	10.1	19.8	12.1	12.3	5.2
	1	0	9.5	3.1	0	13.6	11.4	11.2	28.7	58.5	24.6	18.9	16.1	0	0			1	21.1	39.8	0	12.4	0	0	26.7	14.1	0	8.9
	2	94.7	7.3	85.7	2	67.1	0	83.4	99.8	62.4	55.8	95.8	100	66.7	100			2	61.7	61.5	86.5	67.2	100	100	41.7	57.8	98.6	7.4
	3	99.4	35.9	100	99.1	84.6	93.4	96.1	100	95.4	64.9	99.8	100	99.6	100			3	84.3	83	100	75.9	100	100	42.7	85.1	100	45.5
	Stim+Vehicle (% Freezing )											Stim+SCH 58261 (% Freezing )
		1# rat	2# rat	3# rat	4# rat	5# rat	6# rat	7# rat	8# rat				1# rat	2# rat	3# rat	4# rat	5# rat	6# rat	7# rat
	0	3.8	2.1	6.8	0	21.6	1.3	15.9	5.5			0	7.7	0	36.2	10.8	1.9	1.9	1.9
	1	0	0	25.4	0	33.5	32.4	0	18.6			1	0	13	36.9	0	0	8	0
	2	10.8	99.1	75.4	74	75.6	23.9	57.5	100			2	76.5	82.9	100	60.9	0	99.6	68.4
	3	74.3	100	97.2	95.3	90.4	0	83.1	99.6			3	46.4	99.6	92.3	99.5	100	100	66.9

## Sheet: Figure 5F
Figure 5F
	Ctrl (% Freezing )				Stim (% Freezing )				Stim+Vehicle (% Freezing )				Stim+ARL67156 (% Freezing )
	1# rat	91.5			1# rat	41.9			1# rat	50.9			1# rat	81.6
	2# rat	76.3			2# rat	51			2# rat	38.4			2# rat	68.4
	3# rat	81.1			3# rat	25.9			3# rat	46.4			3# rat	62.8
	4# rat	74.6			4# rat	33.1			4# rat	58			4# rat	91
	5# rat	78.1			5# rat	47			5# rat	7.8			5# rat	52.5
	6# rat	89.6			6# rat	21.5			6# rat	42.3			6# rat	55
	7# rat	69.8			7# rat	44.5							7# rat	66.7
	8# rat	69.6			8# rat	38
	9# rat	96.5			9# rat	39.7
	10# rat	91.5			10# rat	62.8
	11# rat	62.5
	12# rat	50.2
	13# rat	62.2
	14# rat	66.8

## Sheet: Figure 5G
Figure 5G
		Ctrl (% Freezing )				Stim (% Freezing )				Stim+Vehicle (% Freezing )				Stim+CPT (% Freezing )
		1# rat	91.5			1# rat	41.9			1# rat	29			1# rat	82
		2# rat	76.3			2# rat	51			2# rat	55.9			2# rat	76.2
		3# rat	81.1			3# rat	25.9			3# rat	33.6			3# rat	89.7
		4# rat	74.6			4# rat	33.1			4# rat	39			4# rat	50.1
		5# rat	78.1			5# rat	47			5# rat	32.5			5# rat	62.7
		6# rat	89.6			6# rat	21.5			6# rat	41.2			6# rat	73.1
		7# rat	69.8			7# rat	44.5			7# rat	19.7			7# rat	67.6
		8# rat	69.6			8# rat	38			8# rat	38			8# rat	89
		9# rat	96.5			9# rat	39.7
		10# rat	91.5			10# rat	62.8
		11# rat	62.5
		12# rat	50.2
		13# rat	62.2
		14# rat	66.8

## Sheet: Figure 5H
Figure 5H
		Ctrl (% Freezing )				Stim (% Freezing )				Stim+Vehicle (% Freezing )				Stim+SCH 58261 (% Freezing )
		1# rat	91.5			1# rat	41.9			1# rat	19.5			1# rat	33.1
		2# rat	76.3			2# rat	51			2# rat	36.7			2# rat	52.6
		3# rat	81.1			3# rat	25.9			3# rat	27.4			3# rat	45.9
		4# rat	74.6			4# rat	33.1			4# rat	47			4# rat	24.7
		5# rat	78.1			5# rat	47			5# rat	17.2			5# rat	41.9
		6# rat	89.6			6# rat	21.5			6# rat	62.5			6# rat	53.7
		7# rat	69.8			7# rat	44.5			7# rat	34.9			7# rat	34.9
		8# rat	69.6			8# rat	38			8# rat	33.1
		9# rat	96.5			9# rat	39.7
		10# rat	91.5			10# rat	62.8
		11# rat	62.5
		12# rat	50.2
		13# rat	62.2
		14# rat	66.8
