# Supplementary material for: Activation of astrocytes in hippocampus decreases fear memory through adenosine A1 receptors
Source: eLife. 2020 Sep 1;9:e57155. doi: 10.7554/eLife.57155 (PMC7505657; doi:10.7554/eLife.57155)
Supplement: Figure 6—figure supplement 1—source data 1. — Values for freezing levels during fear-conditioning test. [file elife-57155-fig6-figsupp1-data1.xlsx]

## Sheet: Figure 6-figure supplement 1A
Figure 6-figure supplement 1A
	Vehicle (% Freezing )										CCPA (% Freezing )
		1# rat	2# rat	3# rat	4# rat	5# rat	6# rat	7# rat				1# rat	2# rat	3# rat	4# rat	5# rat	6# rat	7# rat	8# rat
	0	11.6	3.8	4.2	4.8	7.5	0	16.7			0	27.2	0	3.9	1.7	0	18.4	14.1	0
	1	0	49.9	0	0	0	15.4	51.4			1	31.8	8.1	0	22.5	0	23.5	24.5	15.1
	2	87.9	100	53.4	44.1	64.6	73.9	92.4			2	77.1	97.4	48.4	99.1	44	100	67.5	60.1
	3	100	99.7	84.5	90.9	99	100	100			3	99	100	73.9	98.9	99.9	100	99.6	55.8

## Sheet: Figure 6-figure supplement 1B
Figure 6-figure supplement 1B
	Vehicle (% Freezing )												CCPA (% Freezing )
		1# rat	2# rat	3# rat	4# rat	5# rat	6# rat	7# rat	8# rat	9# rat				1# rat	2# rat	3# rat	4# rat	5# rat	6# rat
	0	14.7	11.8	2.6	0	22	8.2	6.1	0	2.3			0	5.6	5.2	15.6	7.8	19.4	4.5
	1	7.2	20.2	0	0	40.4	24.5	0	19.6	7.2			1	25	0	18.6	8.2	8.4	0
	2	29.6	64.3	74.3	65.9	100	90.6	65.3	29.9	93.9			2	68.4	95.4	83	84.68	30.8	31.8
	3	100	85.3	100	87.1	100	100	77.6	97.4	100			3	100	100	88.4	100	96.7	36.6

## Sheet: Figure 6-figure supplement 1C
Figure 6-figure supplement 1C
	Vehicle (% Freezing )										CCPA (% Freezing )
		1# rat	2# rat	3# rat	4# rat	5# rat	6# rat	7# rat				1# rat	2# rat	3# rat	4# rat	5# rat	6# rat	7# rat	8# rat
	0	13.2	16.5	3.9	3.5	3.5	5.7	1.7			0	14.7	16.8	11.9	2	4.3	0	7.3	5.8
	1	21.1	7.9	0	0	15	32.8	0			1	28.9	0	7.3	0	19.8	0	0	7.3
	2	58.7	67.4	69	100	58.55	35.7	72.9			2	84.3	57.5	82.5	76.7	90.3	48.56	3.4	25
	3	78.3	100	100	100	100	57.1	99.4			3	99.7	81.2	100	100	100	100	28.6	100

## Sheet: Figure 6-figure supplement 1D
Figure 6-figure supplement 1D
	Vehicle (% Freezing )													CCPA (% Freezing )
		1# rat	2# rat	3# rat	4# rat	5# rat	6# rat	7# rat	8# rat	9# rat	10# rat				1# rat	2# rat	3# rat	4# rat	5# rat	6# rat	7# rat	8# rat	9# rat	10# rat
	0	7.4	4.2	10.9	8.6	18.5	15	31.8	5	20.4	3.5			0	23.4	12.1	12.3	3.6	4	43	18.3	10.6	0	0
	1	26.6	0	0	49.8	39.3	16.9	20.1	14.9	9.2	0			1	27.9	14.1	25.6	7.4	0	33.4	23.7	7.7	0	0
	2	99.9	81	100	100	53.8	22.7	68.9	57.9	59.3	52.1			2	95.5	57.8	92.4	82.5	100	49.4	100	60.6	64.6	71.9
	3	99.6	100	100	100	93.3	99.8	72.6	44.5	89.9	90.2			3	100	85.1	100	96.4	100	99.5	100	100	73.9	50.9

## Sheet: Figure 6-figure supplement 1E
Figure 6-figure supplement 1E
	Vehicle (% Freezing )												CCPA (% Freezing )
		1# rat	2# rat	3# rat	4# rat	5# rat	6# rat	7# rat	8# rat	9# rat				1# rat	2# rat	3# rat	4# rat	5# rat	6# rat	7# rat	8# rat	9# rat
	0	16.5	5.8	11.1	2.4	38.2	15.9	4	19	1.9			0	14.8	15.8	2.5	13	28.6	5.3	0	17.7	10
	1	14.2	7.1	38.9	13.4	35.7	0	0	38.1	0			1	19.6	28.2	0	28.2	36.4	1.2	0	10.9	0
	2	100	100	66.3	68.7	72.3	94.7	80.8	74.2	10.5			2	29.6	97.4	58.2	88.9	92.7	75.3	99.6	99.9	34.9
	3	100	100	89	100	100	100	84.1	100	0			3	100	82.1	100	100	83.6	100	100	100	22.6

## Sheet: Figure 6-figure supplement 1F
Figure 6-figure supplement 1F
	Vehicle (% Freezing )													CCPA (% Freezing )
		1# rat	2# rat	3# rat	4# rat	5# rat	6# rat	7# rat	8# rat	9# rat	10# rat				1# rat	2# rat	3# rat	4# rat	5# rat	6# rat	7# rat	8# rat	9# rat
	0	14.9	23.5	3.7	12.4	5.8	10.1	1.8	20.3	4.3	2.1			0	0	16.3	11.4	18.3	8	22.1	4.1	3.9	14.3
	1	35.1	27.9	0	16.6	27.7	0	0	0	20.9	7.1			1	32.3	0	10.4	0	25.2	21.1	7.4	17.4	17.9
	2	100	67.6	100	77.2	99.9	94.4	7.3	54.1	0	99.5			2	83.4	99.5	67	99.6	65.6	85.1	0	81.1	100
	3	99.3	100	100	88.1	99.5	99.9	99.4	42.8	92.5	85.9			3	100	100	74.7	99.1	100	49.8	100	100	100
