# Supplementary material for: Activation of astrocytes in hippocampus decreases fear memory through adenosine A1 receptors
Source: eLife. 2020 Sep 1;9:e57155. doi: 10.7554/eLife.57155 (PMC7505657; doi:10.7554/eLife.57155)
Supplement: Figure 6—figure supplement 2—source data 1. — Values for moving distance and center zone exploration time in the open-field test. [file elife-57155-fig6-figsupp2-data1.xlsx]

## Sheet: Figure 6-figure supplement 2B
Figure 6-figure supplement 2B
			Distance moved (m)										Distance moved (m)
		Vehicle (0.1 mg/kg)	25.959	26.715	37.925	24.155	18.887	27.711	20.223			Vehicle (0.3 mg/kg)	27.213	25.002	24.509	24.523	14.157	16.74	18.177	15.611	22.168
		CCPA (0.1 mg/kg)	12.108	23.94	17.903	29.483	17.054	23.616	27.787			CCPA (0.3 mg/kg)	13.074	11.875	5.917	5.119	16.517	11.205	6.91

## Sheet: Figure 6-figure supplement 2C
Figure 6-figure supplement 2C
		Center zone time (s)										Center zone time (s)
	Vehicle (0.1 mg/kg)	9.1	14.6	14.6	1.8	1	7.7	6.2			Vehicle (0.3 mg/kg)	22.3	10.2	11	7.3	0	1.9	2.4	1.9	3.6
	CCPA (0.1 mg/kg)	3.4	6.6	2.8	11.8	3.2	3.2	14.8			CCPA (0.3 mg/kg)	7.2	5.5	0.8	5.2	9.6	4.2	1.4

## Sheet: Figure 6-figure supplement 2D
Figure 6-figure supplement 2D
	Vehicle (0.3 mg/kg)		Distance moved (m)										CCPA (0.3 mg/kg)		Distance moved (m)
		0 h	27.213	25.002	24.509	24.523	14.157	16.74	18.177	15.611	22.168			0 h	13.074	11.875	5.917	5.119	16.517	11.205	6.91
		5 h	21.679	31.107	10.65	11.662	10.688	21.375	20.77	15.729	22.01			5 h	12.406	16.733	15.897	17.635	21.191	13.933	13.749
		24 h	14.425	30.505	21.002	12.042	12.027	14.431	22.594	20.068	24.646			24 h	27.217	31.918	23.988	12.911	20.372	18.531	9.83
	Vehicle (0.3 mg/kg)		Center zone time (s)										CCPA (0.3 mg/kg)		Center zone time (s)
		0 h	22.3	10.2	11	7.3	0	1.9	2.4	1.9	3.6			0 h	7.2	5.5	0.8	5.2	9.6	4.2	1.4
		5 h	4	14.4	1.2	0	1.3	5.3	10.8	3.5	9.6			5 h	4	8.5	8.8	3.7	3	2.4	0
		24 h	0	7.1	2.3	5.2	0.2	1	11.9	7.9	5.8			24 h	19.9	11.8	8.9	0	6.1	0	0.5
