# Supplementary material for: Activation of astrocytes in hippocampus decreases fear memory through adenosine A1 receptors
Source: eLife. 2020 Sep 1;9:e57155. doi: 10.7554/eLife.57155 (PMC7505657; doi:10.7554/eLife.57155)
Supplement: Figure 6—source data 1. — Values for freezing levels during fear-conditioning test; values for moving distance and center zone exploration time in the open-field test. [file elife-57155-fig6-data1.xlsx]

## Sheet: Figure 6B
Figure 6B
	Vehicle (% Freezing )										CCPA (% Freezing )
		1# rat	2# rat	3# rat	4# rat	5# rat	6# rat	7# rat				1# rat	2# rat	3# rat	4# rat	5# rat	6# rat	7# rat	8# rat
	D2	97.2	92.3	85.7	71.5	50.7	83.2	88.5			D2	76.6	52.5	85	62.2	57.2	72.2	98.5	48.2
	D3	52.5	75.4	72.4	80.7	65.5	56.2	88.9			D3	30.7	46.2	86.1	65.9	40.6	63.2	75	48.1

## Sheet: Figure 6C
Figure 6C
	Vehicle (% Freezing )												CCPA (% Freezing )
		1# rat	2# rat	3# rat	4# rat	5# rat	6# rat	7# rat	8# rat	9# rat				1# rat	2# rat	3# rat	4# rat	5# rat	6# rat
	D2	97.8	76.4	68.5	88.7	96.7	90.8	77	60.8	56.6			D2	77.6	48.1	14.4	6.5	46.7	62.6
	D3	38.7	81.2	35	94	83.7	76.1	33.6	51.1	63.1			D3	37.7	23	7.2	0	43.7	33

## Sheet: Figure 6D
Figure 6D
		Vehicle (% Freezing )										CCPA (% Freezing )
			1# rat	2# rat	3# rat	4# rat	5# rat	6# rat	7# rat				1# rat	2# rat	3# rat	4# rat	5# rat	6# rat	7# rat	8# rat
		D2	62.9	67.5	96.2	75.3	92.7	74.5	93.1			D2	41.6	45.9	17.6	72.9	50.4	46.6	56	67.2
		D3	82.3	75.3	80.6	55.3	66.7	56.8	62.4			D3	19.8	30.2	16.8	31.9	38.1	50.5	78.6	60.9

## Sheet: Figure 6F
Figure 6F
	Vehicle (% Freezing )													CCPA (% Freezing )
		1# rat	2# rat	3# rat	4# rat	5# rat	6# rat	7# rat	8# rat	9# rat	10# rat				1# rat	2# rat	3# rat	4# rat	5# rat	6# rat	7# rat	8# rat	9# rat	10# rat
	D2	90.4	56.3	88.8	94.2	55.3	85.4	62.3	93.5	98.3	71.2			D2	71	50.8	76.8	39.9	36	64.2	47.6	44.6	60.3	53.2
	D3	92.5	24	53.4	90.1	85.9	38.1	87.9	41.1	74.4	61			D3	14.7	9.5	31.5	14.3	29	56	34.4	49.4	46.3	45.3

## Sheet: Figure 6G
Figure 6G
	Vehicle (% Freezing )												CCPA (% Freezing )
		1# rat	2# rat	3# rat	4# rat	5# rat	6# rat	7# rat	8# rat	9# rat				1# rat	2# rat	3# rat	4# rat	5# rat	6# rat	7# rat	8# rat	9# rat
	D2	89.8	63.8	80.9	55.4	57.1	66.2	80.4	79.1	78			D2	67.9	52.9	49.9	38.5	28.6	41.1	74.4	13.8	58
	D3	37.8	61.1	64.2	55.6	81.6	85.2	53.5	45	76			D3	23.8	24.7	8.3	18.8	15.2	33.8	42.3	35.5	59.3

## Sheet: Figure 6H
Figure 6H
		Vehicle (% Freezing )													CCPA (% Freezing )
			1# rat	2# rat	3# rat	4# rat	5# rat	6# rat	7# rat	8# rat	9# rat	10# rat				1# rat	2# rat	3# rat	4# rat	5# rat	6# rat	7# rat	8# rat	9# rat
		D2	94.5	78.7	46.8	66.7	87	70.9	87.9	86.6	64.4	72.4			D2	78	71.3	58.6	90.5	77	89.5	81.8	72.7	64.8
		D3	44.7	44.1	26.6	50.9	82.6	61	74.4	86.7	64.7	87.1			D3	64.8	83.7	21.9	74.1	77.6	87	64.9	52.6	51.6

## Sheet: Figure 6J
Figure 6J
	Ctrl—Distance moved (m)				Fear + Vehicle—Distance moved (m)				Fear + CCPA—Distance moved (m)
	1# rat	18.654			1# rat	10.257			1# rat	17.465
	2# rat	13.61			2# rat	18.984			2# rat	17.624
	3# rat	16.827			3# rat	6.983			3# rat	17.466
	4# rat	28.85			4# rat	10.883			4# rat	19.914
	5# rat	27.902			5# rat	12.571			5# rat	20.575
	6# rat	19.139			6# rat	8.448			6# rat	12.382
	7# rat	20.465			7# rat	5.371			7# rat	23.151
	8# rat	16.56			8# rat	10.599			8# rat	19.597
	9# rat	28.5			9# rat	16.805
	10# rat	20.094
	11# rat	20.168
	12# rat	26.906
	13# rat	26.853
	14# rat	24.339
	15# rat	25.181
	16# rat	24.315

## Sheet: Figure 6K
Figure 6K
	Ctrl—Center zone time (s)				Fear + Vehicle—Center zone time (s)				Fear + CCPA—Center zone time (s)
	1# rat	3			1# rat	0			1# rat	5.2
	2# rat	18.9			2# rat	3.1			2# rat	24.8
	3# rat	11.2			3# rat	1.4			3# rat	7.6
	4# rat	2.6			4# rat	0			4# rat	11.9
	5# rat	11.3			5# rat	1.2			5# rat	9.6
	6# rat	1			6# rat	1.6			6# rat	8.3
	7# rat	1.2			7# rat	0.5			7# rat	11.9
	8# rat	9.2			8# rat	2.4			8# rat	9.5
	9# rat	2.8			9# rat	5.6
	10# rat	6
	11# rat	7
	12# rat	15
	13# rat	8.6
	14# rat	13.5
	15# rat	5.7
	16# rat	22.6

## Sheet: Figure 6M
Figure 6M
	Ctrl—Distance moved (m)				Fear + Vehicle—Distance moved (m)				Fear + CCPA—Distance moved (m)
	1# rat	12.522			1# rat	17.099			1# rat	14.014
	2# rat	12.727			2# rat	12.403			2# rat	15.534
	3# rat	14.067			3# rat	21.51			3# rat	33.179
	4# rat	20.151			4# rat	13.622			4# rat	23.095
	5# rat	22.557			5# rat	16.669			5# rat	14.782
	6# rat	26.845			6# rat	12.932			6# rat	23.581
	7# rat	27.123			7# rat	10.218			7# rat	24.066
	8# rat	27.516			8# rat	6.416			8# rat	22.165
	9# rat	22.619			9# rat	11.749
	10# rat	15.179
	11# rat	9.739
	12# rat	17.811
	13# rat	21.522
	14# rat	18.169
	15# rat	14.36
	16# rat	25.432

## Sheet: Figure 6N
Figure 6N
	Ctrl—Center zone time (s)				Fear + Vehicle—Center zone time (s)				Fear + CCPA—Center zone time (s)
	1# rat	4.8			1# rat	4.2			1# rat	3.2
	2# rat	8.6			2# rat	3.8			2# rat	2.5
	3# rat	3.4			3# rat	0			3# rat	22.1
	4# rat	3.2			4# rat	0			4# rat	5.9
	5# rat	15			5# rat	7			5# rat	4.3
	6# rat	4.9			6# rat	2.2			6# rat	7.6
	7# rat	12			7# rat	3.6			7# rat	17.3
	8# rat	8.4			8# rat	0			8# rat	11.6
	9# rat	8.8			9# rat	1.9
	10# rat	13
	11# rat	11.9
	12# rat	9.1
	13# rat	7.1
	14# rat	12.7
	15# rat	22.1
	16# rat	2.6
